# Supplementary material for: Clinical Prediction Models for Recurrence in Patients with Resectable Grade 1 and 2 Sporadic Non-Functional Pancreatic Neuroendocrine Tumors: A Systematic Review
Source: MDPI journal article supplement (doi:10.3390/cancers15051525), 2023-02-28
Supplement: s1 [file s1]

**Table S1.** Critical appraisal table

|                                                   |               | Ballian (2009) | Dong (2021) | Fisher (2019) | Genç (2018) | Heidsma (2021) | Liu (2013) | Primavesi (2020) | Pulvirenti (2021) | Sho (2018) | Sun (2019) | Viúdez (2016) | Wei (2021) | Zhou (2017) | Zou (2020) |
|---------------------------------------------------|---------------|----------------|-------------|---------------|-------------|----------------|------------|------------------|-------------------|------------|------------|---------------|------------|-------------|------------|
| Source of data and participant selection          | Applicability | ✓              | ✓           | ✓             | ✓           | ✓              | ✓          | ✓                | ✓                 | ✓          | ✓          | ✓             | ✓          | ✓           | ✓          |
|                                                   | Risk of Bias  | ✓              | ✓           | ✓             | ✓           | ✓              | ✓          | ✓                | ✓                 | ✓          | ✓          | ✓             | ✓          | ✓           | ✓          |
| Predictor selection                               | Applicability | ✓              | ✓           | ✓             | ✓           | ✓              | ✓          | ✓                | ✓                 | ✓          | ✓          | ✗             | ✗          | ✓           | ✓          |
|                                                   | Risk of Bias  | ✓              | ✓           | ✓             | ✓           | ✓              | ✓          | ✓                | ✓                 | ✓          | ✓          | ✓             | ✓          | ✓           | ✓          |
| Appropriate outcome determination                 | Applicability | ✓              | ✓           | ✓             | ✓           | ✓              | ✓          | ✓                | ✓                 | ✓          | ✓          | ✓             | ✓          | ✓           | ✓          |
|                                                   | Risk of Bias  | ✓              | ✓           | ✗             | ✓           | ✓              | ✓          | ✓                | ✓                 | ✓          | ✓          | ✓             | ✓          | ✓           | ✓          |
| Analysis: development, performance and evaluation | Risk of Bias  | ✗              | ✗           | ✗             | ✗           | ✓              | ✗          | ✗                | ✗                 | ✗          | ✗          | ✗             | ✗          | ✗           | ✗          |
| Overall judgment Risk of Bias                     |               | ✗              | ✗           | ✗             | ✗           | ✓              | ✗          | ✗                | ✗                 | ✗          | ✗          | ✗             | ✗          | ✗           | ✗          |

✓ = low risk of bias; ✗ = high risk of bias
